# Supplementary material for: A Bayesian decision fusion approach for microRNA target prediction
Source: PubMed Central journal article supplement (PMC3535698; doi:10.1186/1471-2164-13-s8-s13), 2012-12-17

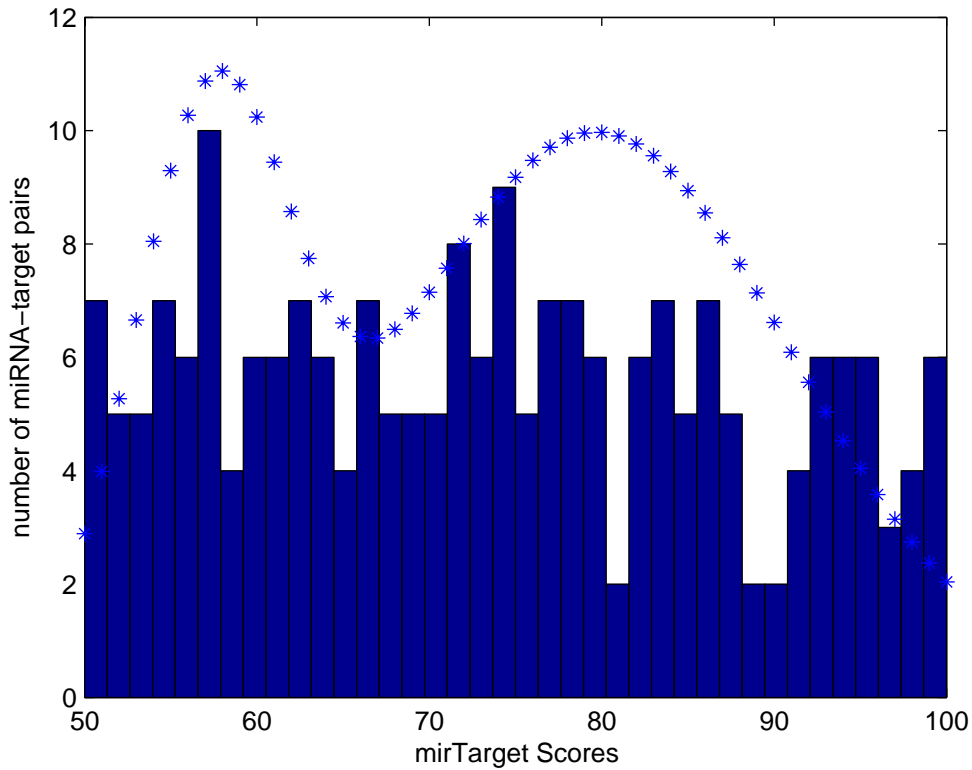

Supplement: 1471-2164-13-S8-S13-S3.pdf [file 1471-2164-13-S8-S13-S3.pdf]
